# Supplementary material
Source: PubMed Central journal article supplement (PMC6038020)

# Whatsapp use for MFM specialists survey

This tool has been developed to assess the usefulness of the UofT MFM Grads Whatsapp group in clinical practice and also for ongoing improvement.

Your name is asked in order to keep track of all the group members and to avoid double entries.

All information will remain confidential and used for research purposes only.

Thank you

**\*Required**

**1. How old are you? \***

*Mark only one oval.*

- 21-29
- 30-39
- 40-49
- 50-59
- 60 or older

**2. Are you male or female? \***

*Mark only one oval.*

- Male
- Female

**3. What is your name? \***

---

**4. In what country do you currently live and work? \***

---

**5. How many years have you practiced as a Maternal-Fetal Medicine Specialist? \***

*Mark only one oval.*

- Trainee
- <5
- 5-10
- 11-20
- >20

6. **Have you participated (posted) in the Whatsapp group? \***

Mark only one oval.

- Yes      *Skip to question 7.*
- No      *Skip to question 9.*

## UofT MFM Grads Whatsapp Group - Participated

7. **What kind of posting? (select all that apply) Please specify if "Other" \***

*Tick all that apply.*

- Asked question(s) regarding patient management in certain situations (not related to a specific case)
- Asked question(s) regarding a specific patient case
- Replied with advice regarding patient management scenarios
- Replied with advice regarding specific patient case(s)
- Shared interesting case(s) for education and/or discussion
- Shared interesting article(s) for education and/or discussion
- Asked for presentation(s)
- Shared presentation(s)
- Shared other educational material
- Other: \_\_\_\_\_

8. **What changes would you make to the group in order to use it more? \***

\_\_\_\_\_

*Skip to question 11.*

## UofT MFM Whatsapp Group - Not participated

9. **Why not? (select all that apply) Please specify if "Other" \***

*Tick all that apply.*

- I don't like participating in mass chat groups
- I don't like participating in mass chat groups. But I enjoy reading the discussions that take place
- I don't have the need to ask for online peer advice. I do this with my own local team
- I don't have an answer for the questions asked
- I don't have the time to read or write on the group
- It's too much, I just muted it and go into it every once in a while
- It's muted and I never look at it
- Whatsapp doesn't work properly on my phone (i.e.: get delayed messages or notifications)
- Other: \_\_\_\_\_

10. **What changes would you make to the group in order to start using it? \***

---

## Regardless if you have or not posted before, Do you think the Whatsapp group has been helpful in...

Please select whether you agree or disagree with the following statements. Select option 2 if it doesn't apply or not sure.

11. **Changing your clinical practice? \***

*Mark only one oval.*

|          |                       |                       |                       |       |
|----------|-----------------------|-----------------------|-----------------------|-------|
|          | 1                     | 2                     | 3                     |       |
| Disagree | <input type="radio"/> | <input type="radio"/> | <input type="radio"/> | Agree |

12. **Finding advice/orientation for a specific case? \***

*Mark only one oval.*

|          |                       |                       |                       |       |
|----------|-----------------------|-----------------------|-----------------------|-------|
|          | 1                     | 2                     | 3                     |       |
| Disagree | <input type="radio"/> | <input type="radio"/> | <input type="radio"/> | Agree |

13. **Increasing your knowledge of rare conditions? \***

*Mark only one oval.*

|          |                       |                       |                       |       |
|----------|-----------------------|-----------------------|-----------------------|-------|
|          | 1                     | 2                     | 3                     |       |
| Disagree | <input type="radio"/> | <input type="radio"/> | <input type="radio"/> | Agree |

14. **Generating interest in certain conditions? \***

*Mark only one oval.*

|          |                       |                       |                       |       |
|----------|-----------------------|-----------------------|-----------------------|-------|
|          | 1                     | 2                     | 3                     |       |
| Disagree | <input type="radio"/> | <input type="radio"/> | <input type="radio"/> | Agree |

15. **Obtaining learning/teaching materials? \***

*Mark only one oval.*

|          |                       |                       |                       |       |
|----------|-----------------------|-----------------------|-----------------------|-------|
|          | 1                     | 2                     | 3                     |       |
| Disagree | <input type="radio"/> | <input type="radio"/> | <input type="radio"/> | Agree |

16. **Other, please describe:**

---

17. Are you involved in another Maternal-Fetal Medicine / High Risk Obstetrics Whatsapp group for discussing cases? \*

Mark only one oval.

- Yes      *Skip to question 18.*
- No      *Stop filling out this form.*

## Alternate MFM group

18. Can you describe how this alternate group compares to the UofT MFM Grads Whatsapp group? \*

---

---

Powered by

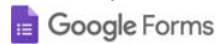

Supplement: OBM_10.1177_1753495X18754457_SupplementaryMaterial.pdf [file OBM_10.1177_1753495X18754457_SupplementaryMaterial.pdf]
