# Supplementary material
Source: PubMed Central journal article supplement (PMC6038020)
Supplement: OBM_10.1177_1753495X18754457_SupplementaryMaterial_Figures.pdf [file OBM_10.1177_1753495X18754457_SupplementaryMaterial_Figures.pdf]

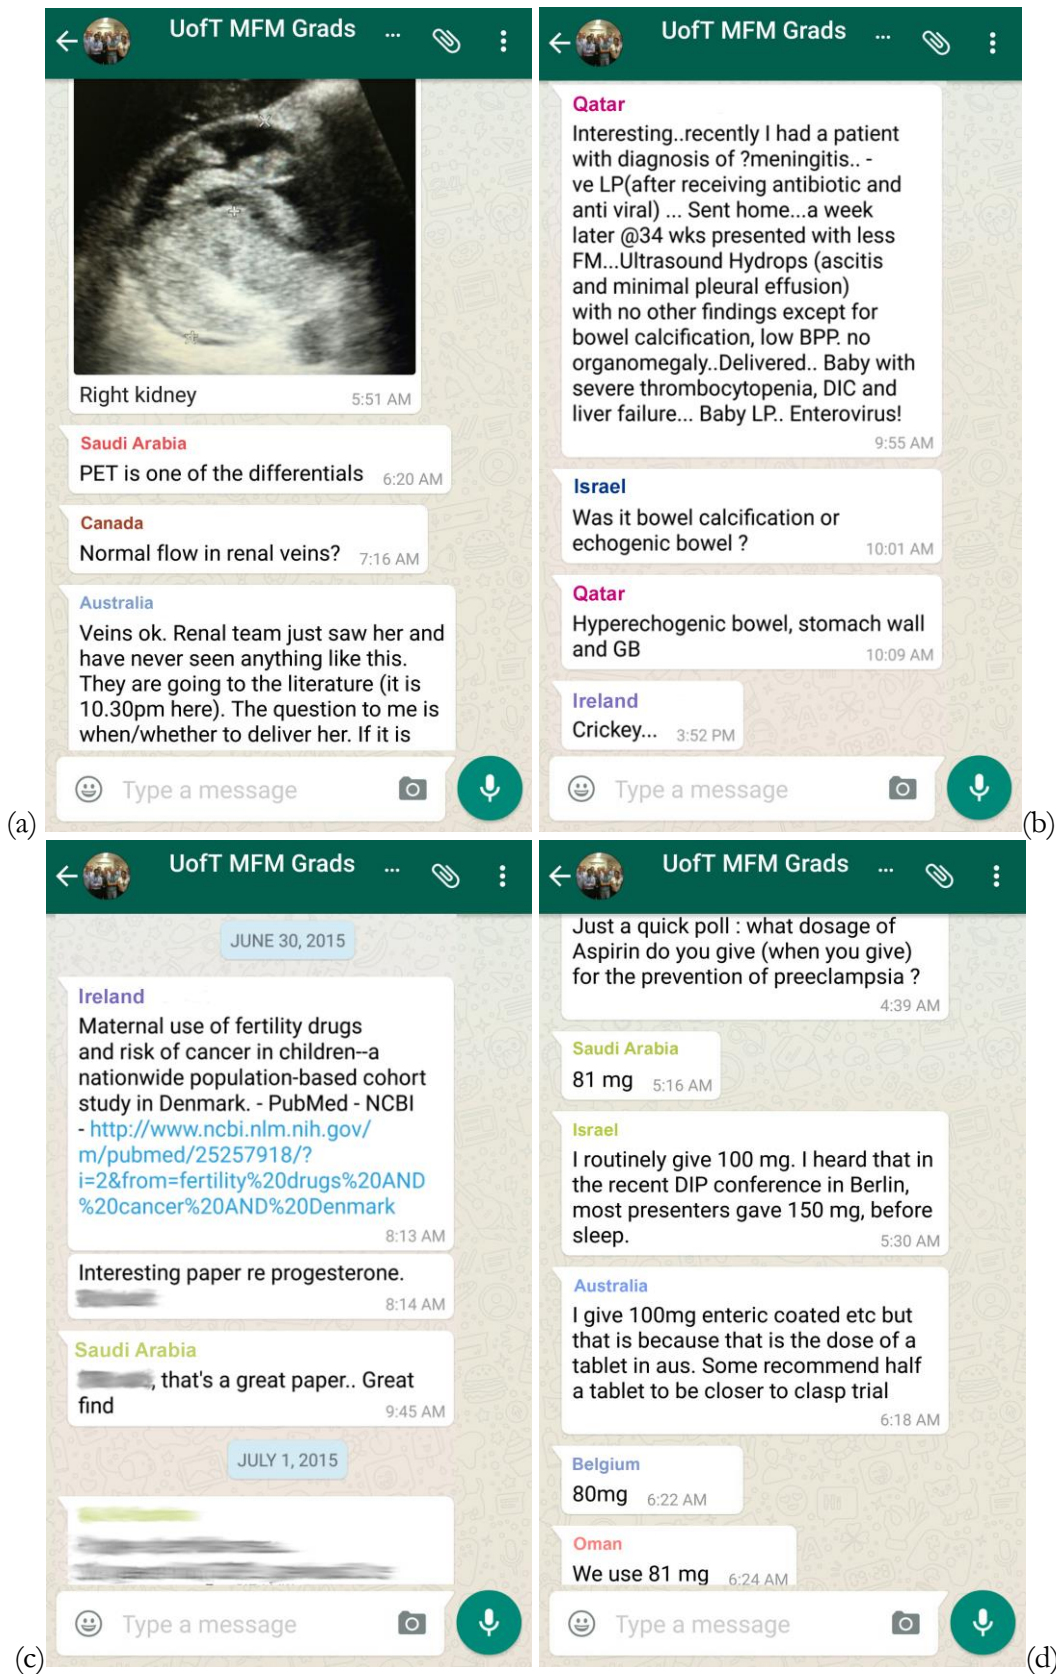

Figure 2. Examples of clinical discussions (a) Advice-seeking (b) Clinical case-sharing (c) Educational content (d) miscellaneous.
